# Supplementary material for: N-doped graphdiyne derivative for highly selective and ultrasensitive NH3 sensing at room temperature
Source: Royal Society of Chemistry journal article supplement (doi:10.1039/d4cp04718d), 2025-01-01
Supplement: d4cp04718d1.pdf [file d4cp04718d1.pdf]

Electronic Supplementary Information for:

## N-doped graphdiyne derivative for highly selective and ultrasensitive NH<sub>3</sub> sensing at room temperature

Dong-Feng Ma,<sup>a</sup> Hai-Qi Liu<sup>b</sup>, Xi-Yu Zhang<sup>b</sup>, Ya-Nan Jia,<sup>b</sup> Xue Zhang,<sup>b</sup> Fang Niu<sup>\*b</sup>, Kai-Feng Zhang<sup>\*a</sup>, and Yong-Qing Zhao<sup>\*b</sup>

<sup>a</sup> Science and Technology on Vacuum Technology and Physics Laboratory, Lanzhou Institute of Physics, Lanzhou, Gansu 730000, China. <sup>b</sup> Key Laboratory of Advanced Catalysis of Gansu Province, College of Chemistry and Chemical Engineering, Lanzhou University, Lanzhou, Gansu 730000, China.

Email addresses: yqzhao@lzu.edu.cn (Yong-Qing Zhao), niufang@lzu.edu.cn (Fang Niu), zhangkf510@sina.com (Kai-Feng Zhang)

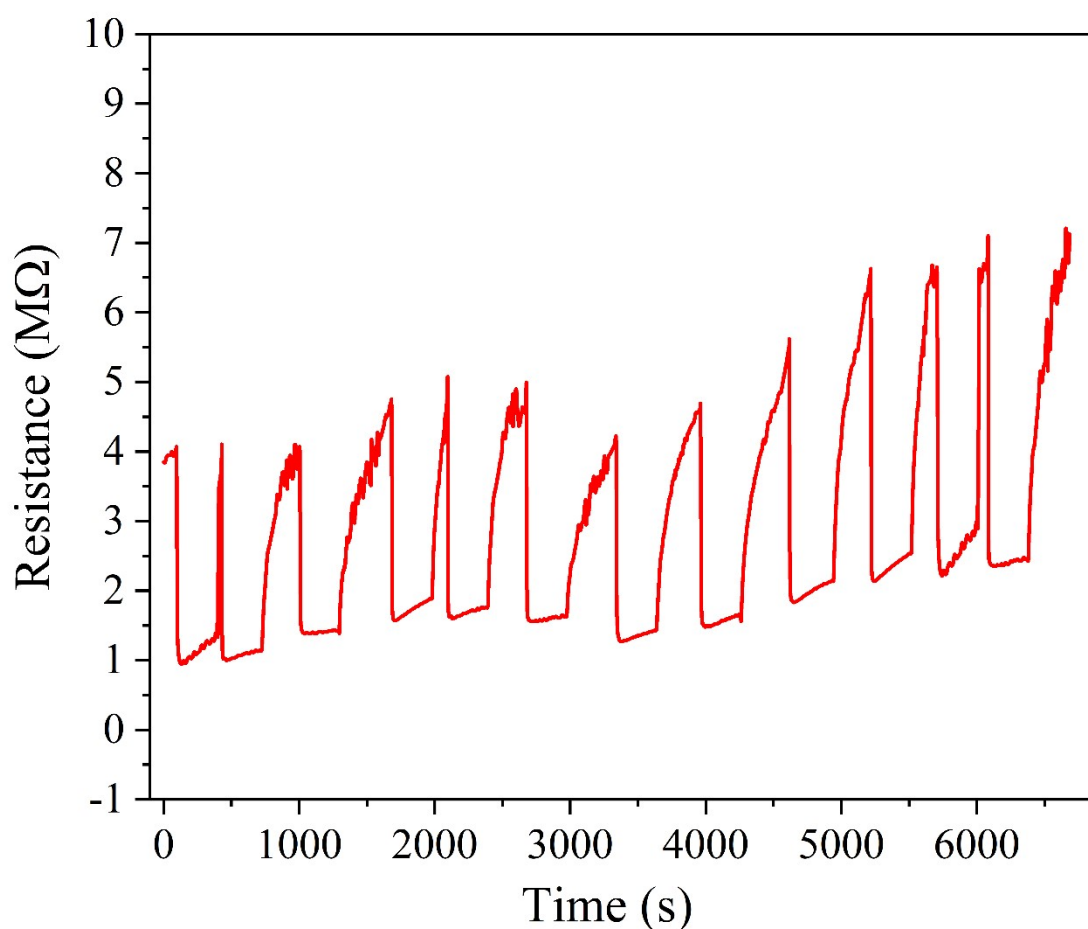

**Fig. S1** Long-term response stability of N-GDYD for 100 ppm NH<sub>3</sub>.

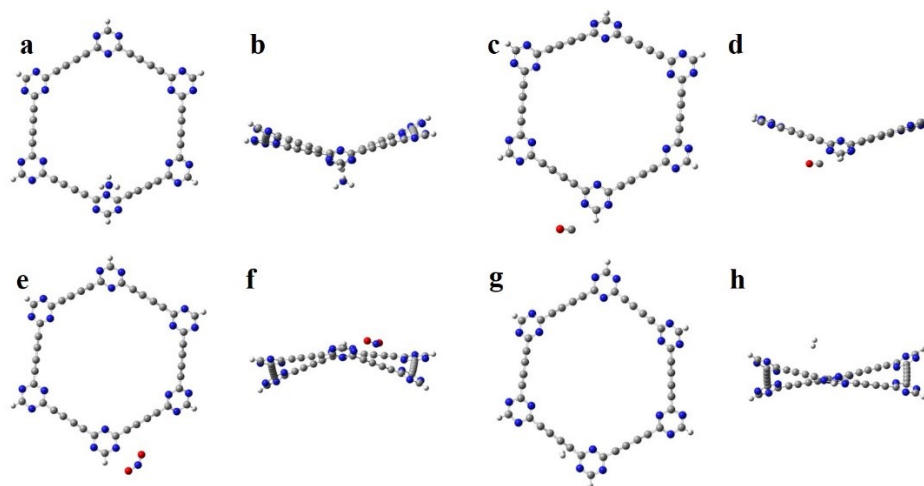

**Fig. S2** Top view of optimized N-GDYD structure for model molecules interact with (a) NH<sub>3</sub>, (c) CO, (e) NO<sub>2</sub>, (g)H<sub>2</sub>; the side view of the optimized N-GDYD structure for the model molecule interacts with (b) NH<sub>3</sub>, (d) CO, (f) NO<sub>2</sub>, (h)H<sub>2</sub>. The grey, blue, white, and red ball represent for the carbon, nitrogen, hydrogen, and oxygen atom, respectively.
